# Supplementary material for: Assessing the Distribution of Exotic Egg Parasitoids of Halyomorpha halys in Europe with a Large-Scale Monitoring Program
Source: PubMed Central journal article supplement (PMC8067160; doi:10.3390/insects12040316), 2021-04-01
Supplement: insects-12-00316-s001.pdf [file insects-12-00316-s001.pdf]

# Supplementary Material: Assessing the Distribution of Exotic Egg Parasitoids of *Halyomorpha halys* in Europe with a Large-Scale Monitoring Program

Livia Zapponi, Francesco Tortorici, Gianfranco Anfora, Simone Bardella, Massimo Bariselli, Luca Benvenuto, Iris Bernardinelli, Alda Butturini, Stefano Caruso, Ruggero Colla, Elena Costi, Paolo Culatti, Emanuele Di Bella, Martina Falagiarda, Lucrezia Giovannini, Tim Haye, Lara Maistrello, Giorgio Malossini, Cristina Marazzi, Leonardo Marianelli, Alberto Mele, Lorenza Michelon, Silvia Teresa Moraglio, Alberto Pozzebon, Michele Preti, Martino Salvetti, Davide Scaccini, Silvia Schmidt, David Szalatnay, Pio Federico Roversi, Luciana Tavella, Maria Grazia Tommasini, Giacomo Vaccari, Pietro Zandigiacomo and Giuseppino Sabbatini-Peverieri

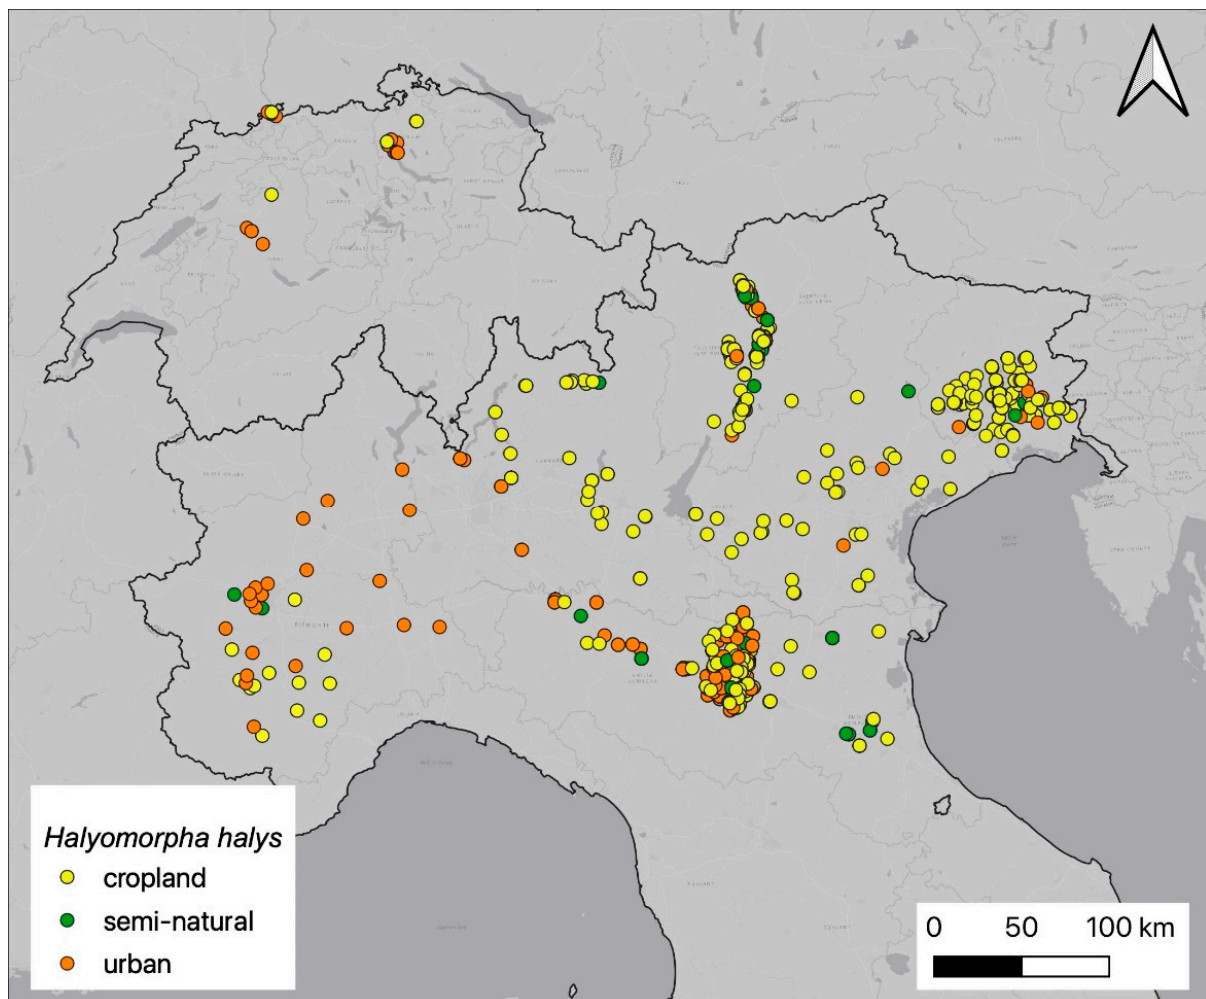

**Figure S1.** Distribution of the collected *Halyomorpha halys* egg masses in Italy (IT) and Switzerland (CH), according to the different surveyed contexts: cropland, semi-natural habitats and urban areas.

**Table S1.** Survey methods applied in the different areas: (a) visual inspection in fixed locations (FV), repeated at least three times during the sampling season; (b) visual inspection in non-fixed locations (V) and c) deployment of sentinel egg masses (S).

| Country     | Region/Canton                    | Survey                |
|-------------|----------------------------------|-----------------------|
| Italy       | Emilia Romagna                   | FV, V                 |
|             | Friuli-Venezia Giulia            | V                     |
|             | Lombardy                         | V                     |
|             | Piedmont                         | FV                    |
|             | Trentino-Alto Adige <sup>1</sup> | FV, V, S <sup>1</sup> |
|             | Veneto                           | FV, V, S              |
| Switzerland | Basel                            | V                     |
|             | Bern                             | V                     |
|             | Ticino                           | S <sup>2</sup>        |
|             | Zürich                           | V                     |

<sup>1</sup>Zapponi et al., 2020; <sup>2</sup>Stahl et al., 2019.

**Table S2.** Host plant for the collected *Halyomorpha halys* egg masses.

| Host Plant Species          |
|-----------------------------|
| <i>Acer campestre</i>       |
| <i>Acer negundo</i>         |
| <i>Acer sp.</i>             |
| <i>Actinidia sp.</i>        |
| <i>Ailanthus altissima</i>  |
| <i>Ocimum basilicum</i>     |
| <i>Cannabis sp.</i>         |
| <i>Carpinus betulus</i>     |
| <i>Cornus mas</i>           |
| <i>Cornus sanguinea</i>     |
| <i>Corylus avellana</i>     |
| <i>Crataegus monogyna</i>   |
| <i>Diospyros kaki</i>       |
| <i>Phaseolus vulgaris</i>   |
| <i>Ficus carica</i>         |
| <i>Fraxinus sp.</i>         |
| <i>Geranium sp.</i>         |
| <i>Helianthus annuus</i>    |
| <i>Hedera helix</i>         |
| <i>Juglans sp.</i>          |
| <i>Laburnum anagyroides</i> |
| <i>Lactuga sp.</i>          |
| <i>Liquidambar sp.</i>      |
| <i>Malus domestica</i>      |
| <i>Paulownia tomentosa</i>  |
| <i>Solanum lycopersici</i>  |
| <i>Prunus armeniaca</i>     |
| <i>Prunus avium</i>         |
| <i>Prunus cerasus</i>       |
| <i>Prunus domestica</i>     |
| <i>Prunus padus</i>         |
| <i>Prunus persica</i>       |
| <i>Prunus sp.</i>           |
| <i>Prunus spinosa</i>       |
| <i>Punica granatum</i>      |
| <i>Sambucus nigra</i>       |
| <i>Sorbus aria</i>          |
| <i>Syringa sp.</i>          |

---

*Tilia platyphyllos*  
*Tilia sp.*  
*Viburnum lantana*  
*Vitis vinifera*  
*Ziziphus jujuba*

---

## References

1. Stahl, J.; Tortorici, F.; Pontini, M.; Bon, M.C.; Hoelmer, K.; Marazzi, C.; Tavella, L.; Haye, T. First discovery of adventive populations of *Trissolcus japonicus* in Europe. *J. Pest Sci.* **2019**, *92*, 371–379. <https://doi.org/10.1007/s10340-018-1061-2>
2. Zapponi, L.; Bon, M.C.; Fouani, J.M.; Anfora, G.; Schmidt, S.; Falagiarda, M. Assemblage of the egg parasitoids of the invasive stink bug *Halyomorpha halys*: insights on plant host associations. *Insects*, **2020**, *11*, 588. <https://doi.org/10.3390/insects11090588>
